# Supplementary material for: Severity of Complications after Locking Plate Osteosynthesis in Distal Femur Fractures
Source: MDPI journal article supplement (doi:10.3390/jcm13051492), 2024-03-05
Supplement: s1 [file s1]

## Supplementary Data 1

Table S1: Inclusion criteria used for this review

|                                  | Inclusion criteria                                                                                                                                 | Justification                                                                        |
|----------------------------------|----------------------------------------------------------------------------------------------------------------------------------------------------|--------------------------------------------------------------------------------------|
| <b>Types of studies</b>          | Publication date 1990 (inclusive)-2022                                                                                                             | Include a large number of papers to capture the current treatment landscape.         |
|                                  | Studies from any geographical location                                                                                                             |                                                                                      |
|                                  | English or German language                                                                                                                         | Languages of the principal researcher.                                               |
|                                  | Clinical trials and observational studies (cohort, case series, case-control, prospective, and retrospective)                                      | For the manageability of search results and applicability to the aim of this review. |
| <b>Types of participants</b>     | Adults                                                                                                                                             | Treatment landscape to include same target patients with regards to age.             |
|                                  | Gender: male and female                                                                                                                            |                                                                                      |
|                                  | Receiving standard minimally invasive or open incision surgical treatment for distal femur fractures (including patients with additional injuries) | Validity of reported outcomes and complications.                                     |
| <b>Types of outcome measures</b> | Surgical and implant details, e.g., surgical duration, implant length (screw holes), plate configuration                                           | Applicability of search results to the aim of this review.                           |
|                                  | Local complications and outcomes                                                                                                                   |                                                                                      |
|                                  | Systemic complications and outcomes                                                                                                                |                                                                                      |
|                                  | Function outcomes: time to weight-bearing, range of motion, and function scores                                                                    |                                                                                      |
|                                  | Implant complications: symptomatic implant, malunion, nonunion, fixation failure                                                                   |                                                                                      |
|                                  | Standardized, patient-reported measures of treatment burden / functional capacity.                                                                 |                                                                                      |

Table S2: Exclusion criteria used for this review

|                                  | Exclusion criteria                                                                                                                      | Justification                                                                                  |
|----------------------------------|-----------------------------------------------------------------------------------------------------------------------------------------|------------------------------------------------------------------------------------------------|
| <b>Types of studies</b>          | Publication date before 1990                                                                                                            | Papers published before this year do not provide a picture of the current treatment landscape. |
|                                  | Language other than German or English                                                                                                   | English and German are the languages of the principal researcher.                              |
|                                  | Articles not published in a peer-reviewed journal                                                                                       | Validity of reported outcomes and complications.                                               |
|                                  | Dissertations /thesis                                                                                                                   | Does not capture a valid treatment landscape.                                                  |
|                                  | Treatment guidelines documents                                                                                                          |                                                                                                |
| <b>Types of participants</b>     | Children                                                                                                                                | Not intended for use in children.                                                              |
|                                  | Participants without distal femur fractures                                                                                             |                                                                                                |
|                                  | Non-surgical treatment                                                                                                                  | Applicability of search results to the aim of this review.                                     |
|                                  | Treatment with methods other than locking plates (e.g., IM nailing) and patients treated with multiple fixation plates (double plating) |                                                                                                |
|                                  | Distal femur fixation within a drug or tissue trial                                                                                     |                                                                                                |
|                                  | Participants with bone defects and bone diseases                                                                                        | For the validity of reported outcomes and complications to the aim of this review.             |
|                                  | Surgical procedures outside of the standard minimally invasive and open incision techniques                                             |                                                                                                |
| <b>Types of outcome measures</b> | Economic burden on health services/systems or health professionals and at a society level.                                              | Applicability of search results to the aim of this review.                                     |
